# Supplementary material for: Effects of in vitro digestion and fecal fermentation on the stability and metabolic behavior of polysaccharides from Craterellus cornucopioides
Source: Royal Society of Chemistry journal article supplement (doi:10.1039/d0fo01430c), 2020-01-01
Supplement: d0fo01430c1.pdf [file d0fo01430c1.pdf]

## Supplementary data

Table S1 Amount of electrolyte solution

| Electrolyte                                     | SSF (mM) | SGF (mM) | SIF (mM) |
|-------------------------------------------------|----------|----------|----------|
| KCl                                             | 30.2     | 13.8     | 13.6     |
| KH <sub>2</sub> PO <sub>4</sub>                 | 7.4      | 1.8      | 1.6      |
| NaHCO <sub>3</sub>                              | 27.2     | 50       | 170      |
| NaCl                                            | -        | 94.4     | 76.8     |
| MgCl <sub>2</sub> ·6H <sub>2</sub> O            | 0.3      | 0.24     | 0.66     |
| (NH <sub>4</sub> ) <sub>2</sub> CO <sub>3</sub> | 0.12     | 1.0      | -        |
| HCl                                             | 2.2      | 31.2     | 16.8     |
| CaCl <sub>2</sub> ·2H <sub>2</sub> O            | 3.0      | 0.3      | 1.2      |

SSF: Simulated salivary fluid; SGF: simulated gastric fluid; SIF: simulated intestinal fluid.

Table S2 The chemical compositions of CCPs.

| Total carbohydrate content (%) | Uronic acid content (%) | Protein content (%) |
|--------------------------------|-------------------------|---------------------|
| 95.54±0.26b                    | 6.35±0.51a              | 3.93±0.99a          |

Table S3 Basic sequencing indexes and Alpha diversity of samples from different treatment groups

| Sample | Seq num      | OUT num  | Shannon index | ACE index | Chao1 index | Coverage      | Simpson        |
|--------|--------------|----------|---------------|-----------|-------------|---------------|----------------|
| BLK    | 59116±22567a | 390±144b | 2.315±1.134b  | 782±142a  | 622±147a    | 0.997±0.0014a | 0.304±0.3165ab |
| CCPs   | 51102±17046a | 300±71ab | 2.271±0.336b  | 778±176a  | 514±101a    | 0.997±0.0005a | 0.176±0.0777a  |
| INL    | 48364±10560a | 231±26a  | 1.314±0.158a  | 800±166a  | 538±63a     | 0.998±0.0002a | 0.598±0.0535b  |
| OR     | 67301±5226a  | 359±16ab | 2.402±0.075b  | 718±26a   | 547±28a     | 0.998±0.0002a | 0.208±0.0081a  |

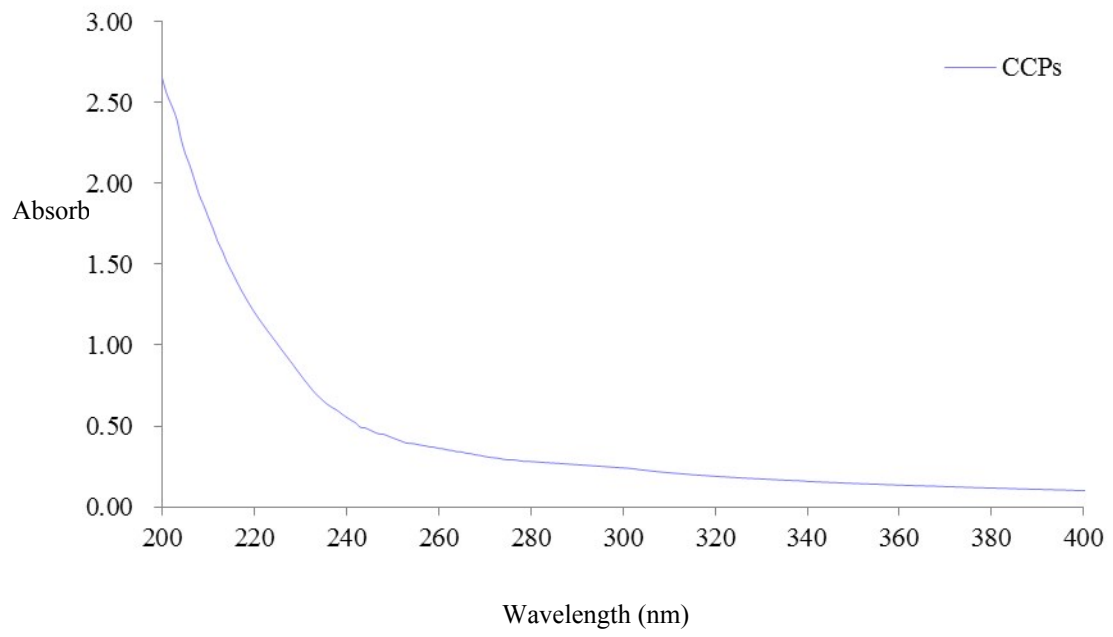

Figure S1 UV spectrum scanning of CCPs.

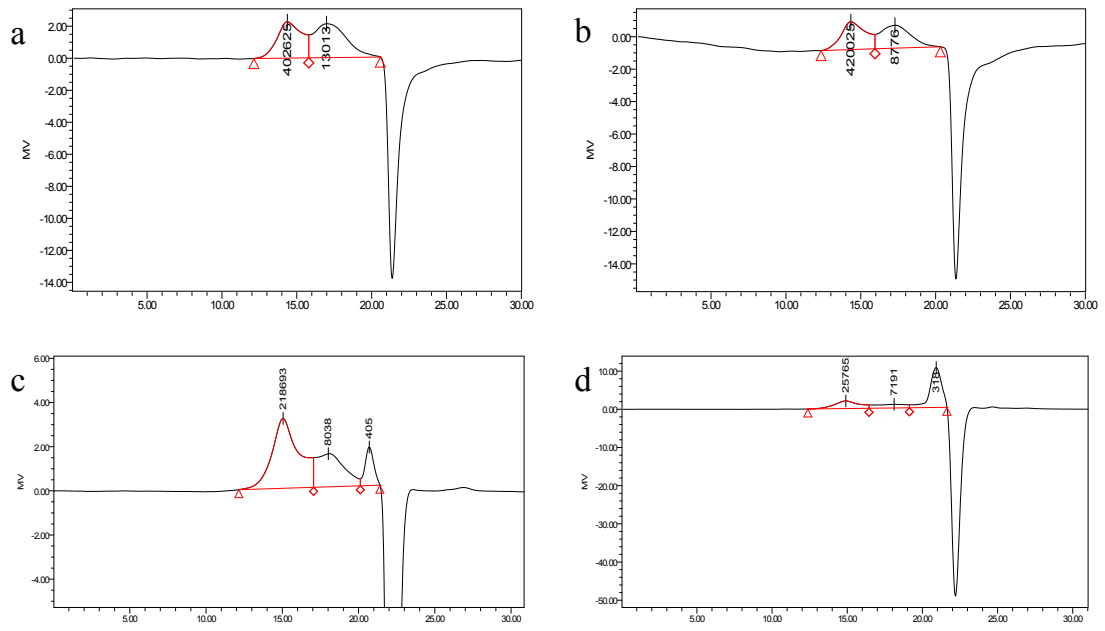

Figure S2 High performance gel permeation chromatograms exhibiting the changes in the Mw of CCPs during digestion. (a) CCPs, polysaccharides from *C. cornucopioides*; (b) CCPs-S, Saliva digestion; (c) CCPs-G, Gastric digestion; (d) CCPs-I, intestinal digestion.

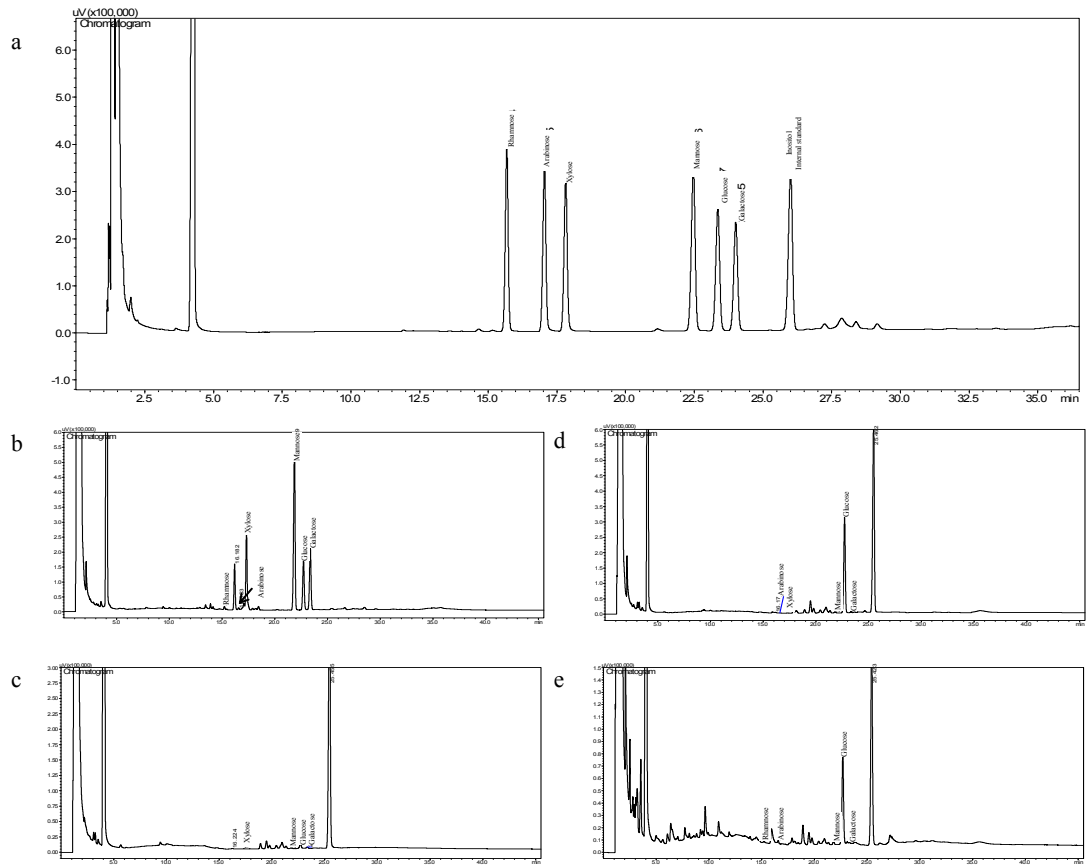

Figure S3 Gas chromatograms exhibiting the monosaccharide compositions of CCPs during digestion. (a) standard sample; (b) CCPs, polysaccharides from *C. cornucopeoides*; (c) CCPs-S, Saliva digestion; (d) CCPs-G, Gastric digestion; (e) CCPs-I, intestinal digestion.

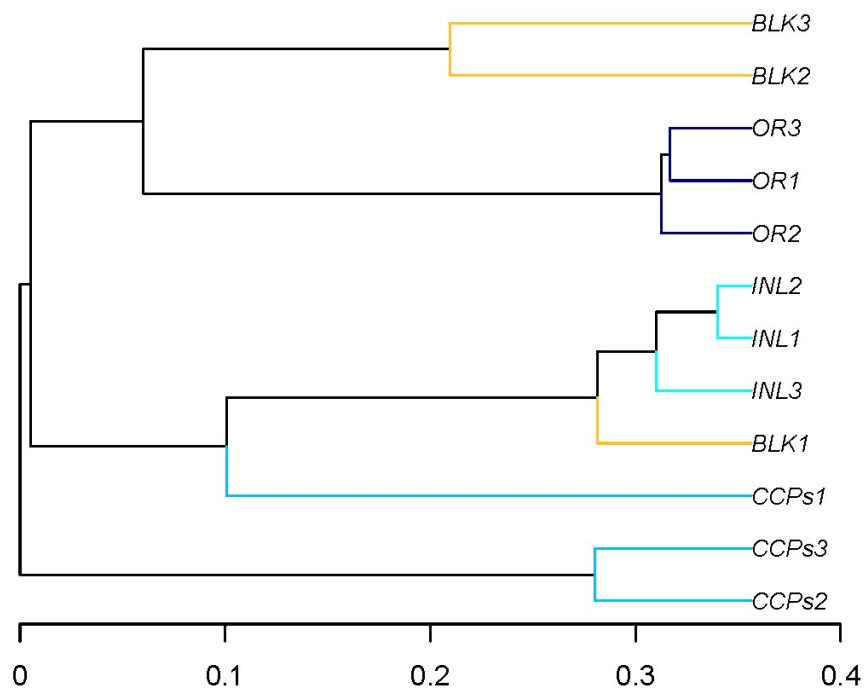

Figure S4 OTU-based sample clustering tree. OR, group of original feces; BLK, group of fermentation *in vitro* without carbon source; INL, group of fermentation *in vitro* with addition of inulin; CCPs, group of fermentation *in vitro* with addition of CCPs.

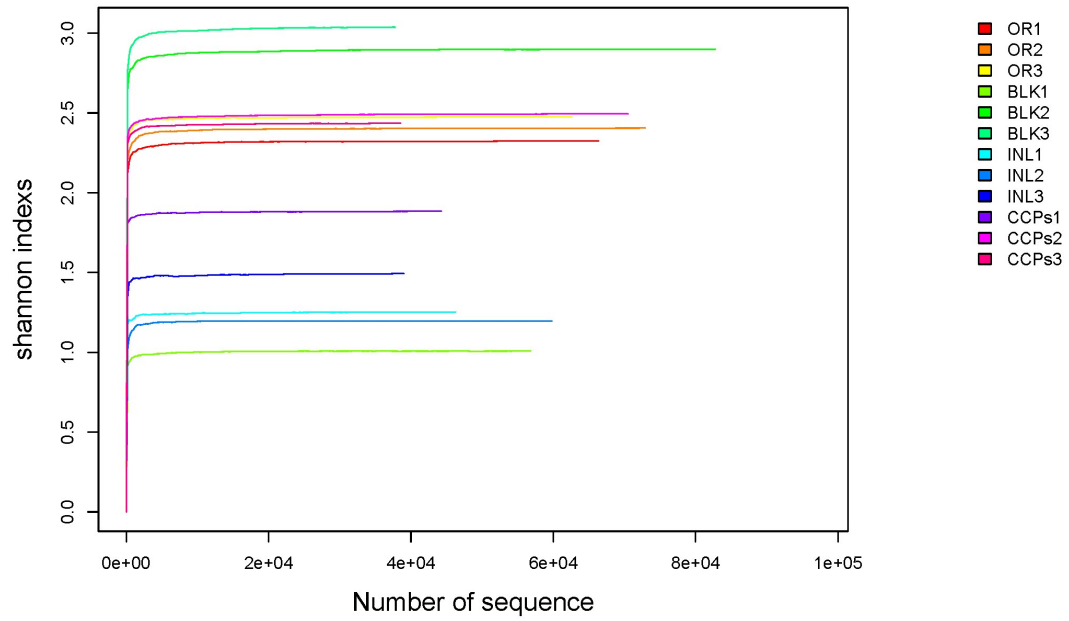

Figure S5 Alpha index rarefaction curve. OR, group of original feces; BLK, group of fermentation *in vitro* without carbon source; INL, group of fermentation *in vitro* with addition of inulin; CCPs, group of fermentation *in vitro* with addition of CCPs.



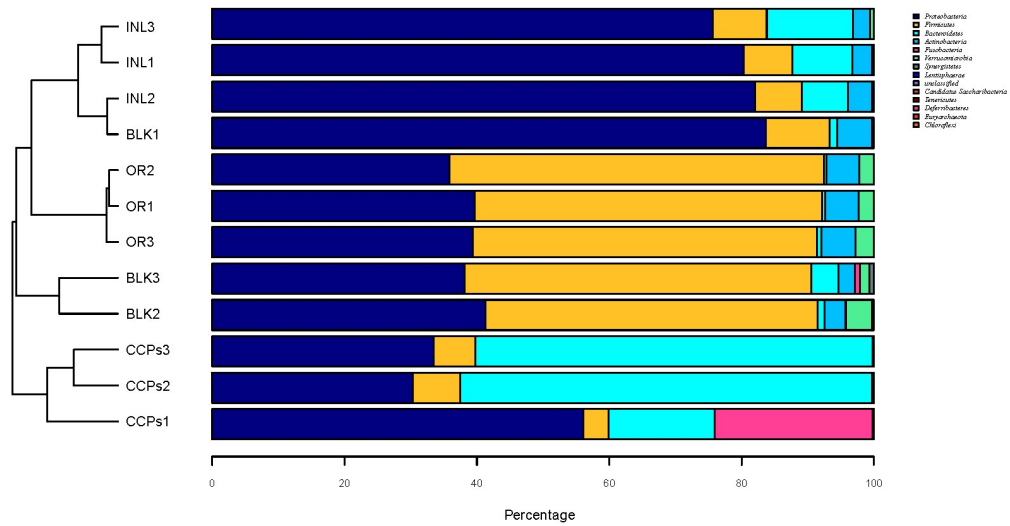

Figure S6 Phylum cluster barplot. OR, group of original feces; BLK, group of fermentation *in vitro* without carbon source; INL, group of fermentation *in vitro* with addition of inulin; CCPs, group of fermentation *in vitro* with addition of CCPs.

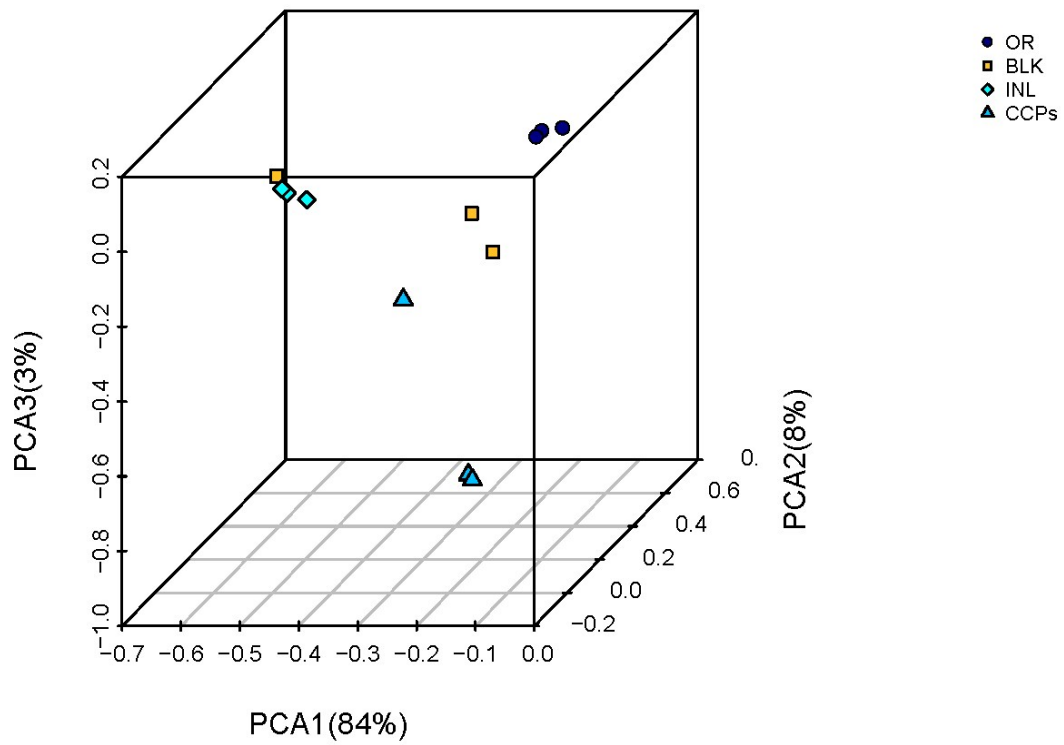

Figure S7 OTU-based 3D PCA diagram. OR, group of original feces; BLK, group of fermentation *in vitro* without carbon source; INL, group of fermentation *in vitro* with addition of inulin; CCPs, group of fermentation *in vitro* with addition of CCPs.

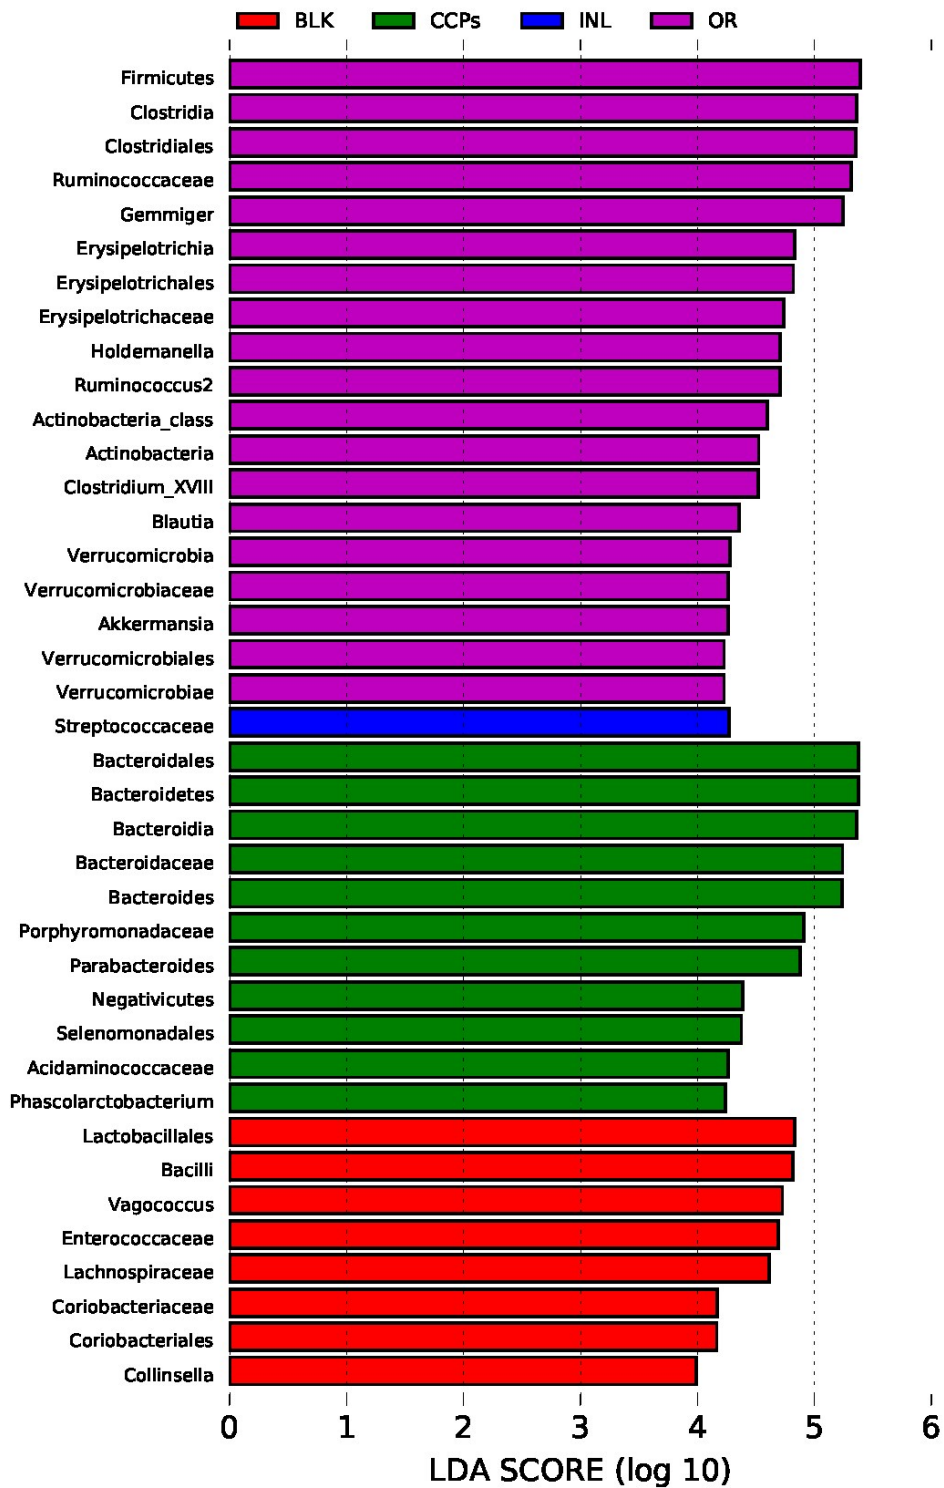

Figure S8 LEfSe analysis histogram. OR, group of original feces; BLK, group of fermentation *in vitro* without carbon source; INL, group of fermentation *in vitro* with addition of inulin; CCPs, group of fermentation *in vitro* with addition of CCPs.
